## Real World Effectiveness of COVID-19 mRNA Vaccines against Hospitalizations and Deaths in the United States

Farhaan S. Vahidy, Lauen Pischel, Mauricio E Tano, Alan P Pan, Marc L Boom, Henry Dirk Sostman, Khurram Nasir, Saad B Omer

The authors have withdrawn this manuscript because they are continuing to review the analytical methods utilized in this iteration of the work and, as of yet, do not have adequate confidence in their reproducibility. Therefore, the authors do not wish this work to be cited as reference for the project. If you have any questions, please contact the corresponding author.
